# Supplementary material
Source: PubMed Central journal article supplement (PMC4787977)
Supplement: bure852079.w1_default.pdf [file bure852079.w1_default.pdf]

## Appendix 1: OPCS codes used to define reoperations

|                    |                             |                                                                                                                                                                                                                                                                                                                                                                                              |
|--------------------|-----------------------------|----------------------------------------------------------------------------------------------------------------------------------------------------------------------------------------------------------------------------------------------------------------------------------------------------------------------------------------------------------------------------------------------|
| Laparotomy         | Reopening of abdomen        | T301 T302 T303 G281 G288 G332 G352 G362 G351<br>G532 G385 G633 H168 H622 T301 T302 T303 T308<br>T309 T331 T411 T414 T418 T419 T428 T431 T432<br>T361 T362 T365 T368 T369 T488 T384 T388 T398<br>T554 M372 P253 P258                                                                                                                                                                          |
|                    | Open procedure for abscess  | T341 T342 T343                                                                                                                                                                                                                                                                                                                                                                               |
|                    | Washout                     | T461 T462 T463 T468 T469 T348 T349 H625                                                                                                                                                                                                                                                                                                                                                      |
|                    | Small bowel operation       | G611 G692 G693 G694 G698 G699 G702 G712 G713<br>G714 G721 G723 G725 G731 G734 G738 G762 G763<br>G768 G784 G786 G788 G822 G828 G513 G584 G588<br>G589 G638 T374 G488 G674 G728 G781 G782 G824<br>G535 G538 G591 G634 G715                                                                                                                                                                     |
|                    | Colorectal resection        | H041 H051 H053 H058 H059 H061 H063 H062 H064<br>H068 H071 H072 H073 H074 H078 H079 H081 H082<br>H083 H084 H085 H088 H091 H092 H093 H094 H095<br>H098 H099 H101 H102 H103 H104 H105 H089 H108<br>H109 H298 H305 H308 H331 H332 H333 H334 H335<br>H336 H338 H339 H111 H112 H113 H114 H115 H118<br>H119 H122 H131 H135 H193 H198 H199 H624 H628<br>H161 H138 G722 H176 H178 H192 H478 H479 H299 |
|                    | Division of early adhesions | T412 T413 T415 T423                                                                                                                                                                                                                                                                                                                                                                          |
|                    | Formation of stoma          | G741 G742 G743 G749 G748 H151 H152 H158 H159                                                                                                                                                                                                                                                                                                                                                 |
| Stoma complication |                             | H141 H142 H148 H149 H153 H155 H156 H163 G739<br>G751 G752 G754 G755 G758 G759 G601 G602 G608<br>G618 G733 G711 G718 G729 G789                                                                                                                                                                                                                                                                |
| Wound complication |                             | S608 S068 S069 S089 S242 S571 S573 S572 S574<br>S575 S577 S578 S579 T282 T283 S424 S428 T288<br>T289 S472 S474 S478 S421 S422 S423 S429 S434<br>S438 S476 S352 S358 S359 T313 T315 T316 T318<br>T774 T963 S628 S132 S152                                                                                                                                                                     |
| Other              | Spleen/liver injury         | J692 J699 J724 J728 J021 J042 J183 J212 J241 J181<br>J185                                                                                                                                                                                                                                                                                                                                    |
|                    | Urological procedures       | M062 M151 M131 M132 M138 M168 M212 M218<br>M162 M193 M221 M264 M359 M373 M378 M379<br>M202 M258 M274 M335 M021 M025 M651 M763<br>M764 M191 M228 M136 M292                                                                                                                                                                                                                                    |
|                    | Repair of incisional hernia | T252 T253 T259 T262 T272 T273 T278 T279 T312                                                                                                                                                                                                                                                                                                                                                 |
|                    | EUA/operation on rectum     | H412 H418 H419 H464 H468 H469 H541 H568 H444<br>H448 Q552                                                                                                                                                                                                                                                                                                                                    |
|                    | Perineal operation          | N242 N248 N249 P111 P131 P138 H531 H558 H581<br>H582 H583 H588 H589                                                                                                                                                                                                                                                                                                                          |
